# Supplementary material for: Neuronal hyperexcitability is a DLK-dependent trigger of herpes simplex virus reactivation that can be induced by IL-1
Source: eLife. 2020 Dec 22;9:e58037. doi: 10.7554/eLife.58037 (PMC7773336; doi:10.7554/eLife.58037)
Supplement: Figure 1—source data 1. [file elife-58037-fig1-data1.xlsx]

## Sheet: Figure 1
1C.				1D.			1E
Mock	Fsk	ddFsk		Mock	8-Bromo-cAMP		Mock	Fsk	Fsk+SQ
0	200	15		2	225		0	350	4
0	250	1		5	175		0	325	14
0	200	0		1	175		2	16	4
0	41	0		1	140		0	15	9
0	10	2		0	84		13	200	55
0	8	4		0	175		13	150	90
3	115	0		0	150		0	300	130
1	175	4		0	95		0	150	50
1	1068	31					1	25	39
16	624	44					0	22	38
4	650	42					3	29	53
2	1258	83					2	56	41
11	202	10
2	253	5
0	153	11
