# Supplementary material for: Neuronal hyperexcitability is a DLK-dependent trigger of herpes simplex virus reactivation that can be induced by IL-1
Source: eLife. 2020 Dec 22;9:e58037. doi: 10.7554/eLife.58037 (PMC7773336; doi:10.7554/eLife.58037)
Supplement: Figure 2—figure supplement 1—source data 1. [file elife-58037-fig2-figsupp1-data1.xlsx]

## Sheet: Figure S1
A						B					C						D						E
	Forskolin					0	24	48	72		0	5	10	15	20		0	5	10	15	20		0	5	10	15	20
0	1	0	0	0		1	1.605	2.958	77.958		1	0.668	1.124	0.637	1.104		1	0.735	3.421	0.415	1.594		1	0.458	2.352	1.101	1.619
20	120	160	0	100		0.837	1.156	3.73	37.636		0.906	1.217	0.587	1.117	0.883		0.906	1.128	0.768	0.707	1.056		0.708	0.768	0.434	0.478	1.019
60	15600	15400	20000	21000		1.028	1.545	15.116	472.499		0.723	0.838	0.449	0.784	1.368		0.702	0.752	0.771	0.725	1.211		0.636	0.476	0.632	0.352	0.726
						1.608	1.646	2.654	8.849		0.728	0.673	0.705	0.32	1.293		0.416	0.864	0.656	0.638	0.77		0.358	0.647	0.415	0.351	0.826
						1.54846	0.89464	2.12012	4.43208			1.185	0.748	0.942	1.224			1.302	0.577	0.593	1.65			0.868	0.449	0.338	0.618
						1.1136	1.02161	1.6491	2.76474		1	1.184	1.094	1.171	1.906		1	1.222	1.294	0.893	4.228		1	0.611	0.632	0.622	3.589
						1	0.810043	5.60125	2.08607		1.261	1.402	1.032	1.366	1.684		0.822	1.105	2.036	1.969	2.443		0.641	0.487	1.39	2.012	2.964
							1.20193	1.32991	5.79964		1.593	0.954	1.876	2.093	2.64		1.826	1.138	1.518	2.836	3.047		0.804	0.488	0.721	1.421	3.318
											0.61	1.604	0.794	1.296	2.613		0.661	1.098	1.248	0.823	2.834		0.341	0.52	0.699	0.258	1.405
												1.3	1.639	1.989	2.105			1.413	1.389	2.41	3.672			0.885	0.86	1.196	3.06
