# Supplementary material for: Neuronal hyperexcitability is a DLK-dependent trigger of herpes simplex virus reactivation that can be induced by IL-1
Source: eLife. 2020 Dec 22;9:e58037. doi: 10.7554/eLife.58037 (PMC7773336; doi:10.7554/eLife.58037)
Supplement: Figure 2—figure supplement 2—source data 1. [file elife-58037-fig2-figsupp2-data1.xlsx]

## Sheet: Figure S2
S2A				S2B				S2C				S2D				S2E				S2F
Mock	FSK	FSK + KT		Mock	FSK	FSK + KT		Mock	Fsk	Fsk+666		Mock	Fsk	Fsk+666		Mock	Fsk	Fsk + ESI		Mock	8bc	8bc+SQ
3	55	37		1.057	1.735	1.569		1	171	96		1	3.473	2.44		0	26	15		0	1	8
3	40	47		1	3.473	3.441		10	78	18		2.694	3.053	2.58		0	17	65		3	13	9
1	39	41		1.516	4.08	2.548		2	462	53		1.516	4.08	3.779		0	2	4		0	2	3
2	41	95		1	3.482	1.314		29	203	10		1	16.02	11.955		0	4	0		0	2	0
2	195	53		1.915	3.479	8.044						1.335	13.715	2.279		0	9	7		2	150	0
2	221	63		1.676	3.851	2.513		7	90	27		1	3.482	1.781		0	10	13		0	70	0
2	462	99		1	10.95	1.78		5	57	28		1.915	3.479	2.093		1				1	4	43
29	203	10		0.482	8.96	8.08		8	163	26		1.676	3.851	1.629		0				0	4	82
22	178	0		1.26		8.3		9	37			1	10.95	7.6		2	250	125		2	3	63
19	39	2		1.857	9.045	2.919		17	110	0		0.482	8.96	14.86		3	350	325		3	6	43
		0		1	13.864	10.171		0	116	0		1.857	9.045	11.718		1	275	275		13	5	80
7	90	36		8.187	4.775	7.713						1	13.864	5.492		1	275	150		13	65	150
5	57	31			7.976	8.615						8.187	4.775	11.582						0	30	100
8	163	29		0.491	6.4632	3.851							7.976	16.173						0	3	75
9	37	16		1	7.356	2.267						0.491	6.4632	13.568						0	0	11
												1	7.356	11.993						1	0	19
