# Supplementary material for: Neuronal hyperexcitability is a DLK-dependent trigger of herpes simplex virus reactivation that can be induced by IL-1
Source: eLife. 2020 Dec 22;9:e58037. doi: 10.7554/eLife.58037 (PMC7773336; doi:10.7554/eLife.58037)
Supplement: Figure 2—source data 1. [file elife-58037-fig2-data1.xlsx]

## Sheet: Figure 2
2A				2B				2C							2D						2E						2F						2G					2H					2I					2J
Mock	Fsk	Fsk + SP6		Mock	Fsk	Fsk + GNE		Superinfection							0	5	10	15	20		0	5	10	15	20		0	5	10	15	20		Mock	Fsk	Fsk+SP6	Fsk+GNE		Mock	Fsk	Fsk+SP6	Fsk+GNE		Mock	Fsk	Fsk+SP6	Fsk+GNE		DLK
1	61	0		1	7	7		0	1	0	0				1	1.035	2.26	0.871	1.422		1	0.655	2.896	0.677	1.195		1	0.294	3.967	1.892	1.341		1	3.551	2.417	1.625		1	4.906	0.778	1.856		1	15.598	1.227	1.358			Density-backround
0	150	0		0	82	0		24	600	650	700				0.9	2.014	1.102	1.272	1.436		1.029	0.918	0.649	0.603	0.968		0.841	0.681	0.262	0.401	1.346		2.07	2.917	2.217	2.041		1.305	3.225	1.732	1.075		2.487	7.846	3.537	0.908		Control	60.199
0	381	0		0	2	10		48							0.674	1.628	0.831	1.109	1.271		0.701	0.431	0.727	0.614	0.868		0.587	0.331	0.833	0.251	0.481		1.102	3.361	1.963	1.633		0.48	3.699	1.216	0.681		1.77	7.942	3.162	0.78		shDLK 1	4.061
0	87	0		0	200	0		72							0.604	1.574	1.142	1.085	1.289		0.481	0.789	0.652	0.452	0.958		0.322	0.515	0.54	0.246	1.169		1.251	4.233	1.275	2.758		0.606	4.778	0.495	2.16		0.378	12.853	0.705	2.017		shDLK 2	1.595
0	127	0		1	3	0										1.357	0.911	1.325	1.456			1.174	0.609	0.353	1.015			1.321	0.561	0.177	0.592		1	2.52	1.112	0.386		1	2.639	1.329	0.989		1	2.741	0.341	0.195
0	305	0		1	52	15		FSK							1	1.609	1.304	1.357	2.896		1	0.951	1.171	0.727	2.662		1	0.362	0.349	0.371	3.227		0.669	3.895	0.975	0.827		0.411	1.625	1.114			0.594	4.057	0.439	0.387		Tubulin
0	5	0		2	25	62		0	1	0	0				0.544	1.719	1.891	1.899	2.504		0.868	0.798	1.795	1.649	2.284		0.38	0.276	1.112	2.086	3.254		0.469	3.015	0.908	0.9		1.769	4.494	0.727	0.47		0.181	4.484	0.769	0.64
0	61	0			300	0		24	5	3	0				1.285	1.608	1.716	2.175	2.888		1.051	0.878	0.924	1.327	2.6		0.402	0.323	0.477	0.808	2.895																	Control	63.756
1	150	0		0	150	2		48	39	25	23				0.628	1.972	1.312	1.529	3.759		0.551	0.712	1.222	0.496	1.617		0.231	0.302	0.501	0.184	1.058																	shDLK 1	70.708
				4	75	1		72	180	86	295					1.731	1.502	2.053	3.252			1.292	1.472	1.209	1.985			0.422	0.581	0.958	2.131																	shDLK 2	65.234
				1	200	0
				0	125	0
