# Supplementary material for: Neuronal hyperexcitability is a DLK-dependent trigger of herpes simplex virus reactivation that can be induced by IL-1
Source: eLife. 2020 Dec 22;9:e58037. doi: 10.7554/eLife.58037 (PMC7773336; doi:10.7554/eLife.58037)
Supplement: Figure 3—figure supplement 1—source data 1. [file elife-58037-fig3-figsupp1-data1.xlsx]

## Sheet: Figure S3
S3B					S3C					S3E					S3F
0	5	10	15		0	5	10	15		Mock	FSK	FSK + S2102	FKS+OG		Mock	Forskolin	Fsk+GSK-J4
12.9	87.912	4.34	1.91		20.205	135.396	85.793	24.748		1	68	12	10		3	129	54
17	54.4	13.03	11.24		14.257	68.514	58.376	21.141		0	22	0			8	294	186
22.3	36.2	5.52	9.87		14.389	24.573	109.144	16.897		2	58	14	40		0	104	55
17.2	21.33	4.1	4.73		17.455	86.101	100.498	20.076		1	172	7	25		0	788	143
19.7	40.5	0.63	9.34		15.873	50.874	25.075	14.028		22	178	37	2		1	219	14
30.8	27	0.24	5.41		28.448	96.069	20.443	17.57		19	39	26	7		3	69	15
27.1	49.9	10.42	4.74		24.658	98.493	50.663	15.568			301	115	12		5	130	28
21.4	44.2	11.82	8.19		18.31	66.11	79.956	20.766							0	58	25
3.2	70.2	10.87	3.86		23.317	79.444	148.272	30.268							22	178	32
15	35.2	1.89	3.83		15.421	56.817	91.23	22.143							19	39	9
18	188	10.76	18.57		16.275	135.066	141.467	22.157								301	41
17.7	31.7	5.97	4.3		19.471	47.682	38.388	165.472
19.4	87.8	6.59	6.83		21.921	125.883	91.382	10.428
16.8	41.01	23.98	5.55		24.216	142.52	96.065	23.155
15.9	62.1	7.14	7.74		36.145	122.02	46.319	11.301
3.13	105.2	14.326	7.57		23.385	129.947	141.226	10.261
10.1	49.1	25.13	5.1		28.296	150.514	138.299	12.481
7.1	61.7	7.17	3.92		22.326	53.427	142.668	24.589
11	64	9	6.4		23.661	117.189	64.723	18.951
8.3	89.2	9.38	4.53		22.393	58.024	99.314	18.697
2.75	38.6	7.41	9.88		21.266	135.213	24.927	13.265
7	26.7	11.61	26.32		25.812	102.463	110.297	16.344
7.92	69.8	8.59	11.81		20.993	121.174	131.183	19.861
8.53	61.62	6.35	42.4		19	79.736	33.819	16.076
5.43	57.5	8.19	6.62		17.664	58.677	76.028	18.715
9.74	104.5	5.91	10.72		19.398	71.897	56.148	14.449
3.142	74	4.24	7.2		22.345	103.604	12.281	15.098
4.654	46.3	5.645	7.27		18.945	111.702	97.824	16.076
5.566	116.6	8.02	44.94		25.541	58.242	46.531	23.145
5.2	51.1	13.31	30.79		14.188	92.822	10.991	20.652
3.11	45.7	9.15	5.61		17.262	99.516	22.618	14.363
3.36	82.8	5.008	7.74		16.449	135.904	45.912	26.33
6.2	54.8	2.74	21.98		14.396	103.036	103.625	23.775
2.7	62.4	6.066	8.23		15.16	63.751	27.726	16.362
6.2	75.4	3.579	10.59		16.593	35.892	92.524	19.229
7.16	86.4	7.706	11.91		29.728	32.583	112.28	22.337
5.62	61.7	8.636	6.37		21.215	50.399	121.379	24.221
2	100.6	15.186	23.5		13.311	102.79	39.548	21.285
9.3	80.1	4.78	25.2		18.427	54.402	109.876	33.119
7.98	75	8.78	6.93		4.204	68.371	20.951	21.53
4.03	92.3	4.22	8.41		17.03	118.206	18.809	24.893
10.66	104.2	3.92	25.53		14.447	61.526	28.492	19.811
3.291	66.7	8.44	6.62		15.738	101.016	110.984	15.943
5.25	107.95	8.237	13.53		19.815	55.409	128.75	15.905
9.12	82.9	7.27	8.26		28.922	68.005	25.023	13.336
1.74	102	3.68	7.192		11.983	117.608	13.134	15.906
6.5	45.9		3.157		13.492	76.688	96.038	16.979
1.824	55.68		4.35		18.86	58.865	24.326	15.586
10.2	45.17		7.93		17.546	61.406	21.69	17.492
8.06	48.2		8.44		29.352	59.913	45.062	20.597
4.59	78.94		12.6		16.648	101.868	44.731	15.857
7.18	74.13		33.72		21.712	109.157	20.662	14.964
14.3	71.6		5.93		15.538	56.124	97.454	12.446
8.9	63.2		6.9		13.146	58.953	55.401	12.636
	18.4		2.7		14.099	99.793	11.268	12.698
	17.83		17.29		20.579	134.938	74.483	16.375
	68.19		12		21.796	98.729	154.601	15.368
	77.1		16.7		20.558	31.622	67.451	12.64
	68.87		18		16.486	34.578	33.793	18.768
	68.93		18.151		16.365	88.278	126.549	15.725
	63.37		28.698		19.44	52.333	24.024	17.802
	77.27		26.819		16.099	96.86	28.887	22.465
	53.77		22.706		19.2	34.733	105.921	21.1
	74.17		17.27		14.995	73.965	62.831	22.746
	77.16		23.822		18.557	19.582	20.39	25.704
	62.68		31.421		27.923	83.131	16.972	21.984
	59		17.682		11.354	53.669	84.867	13.69
	66.3		13.329		15.299	22.575	52.37	16.974
	75.5		16.155		15.211	52.703	21.66	10.084
	62.6		14.211		34.493	61.889	23.478	19.187
	70.76		14.006		9.515	32.02	88.993	14.366
	65.7		16.814		11.677	64.954	85.974	18.484
	39		18.312		14.766	28.927	62.441	13.321
	50.1		20.278		9.856	58.115	89.991	25.16
	51.6		18.678		14.906	54.951	77.629	33.25
	53.3		25.23		9.636	55.489	93.514	43.281
	84.14		30.432		19.793	86.891	111.707	34.186
	81.8		15.046		14.663	28.019	73.017	19.549
	62.67		26.462		8.097	82.164	25.223	20.321
	84.916		32.501		12.978	23.858	18.033	18.23
	84.016		16.449		26.785	71.402	37.671	18.913
	80.347		13.472		13.252	56.671	28.676	20.074
	40.3		25.154		8.688	93.223	49.439	19.371
	41.77		19.085		12.287	59.79	49.307	18.073
	44.4		14.238		35.942
	64.4		12.011		17.839
	77.6		16.138		19.448
	79.465		12.902		19.636
	82.195		17.913		26.007
	60.331		23.135		29.011
	48.869		12.763		22.757
	79.876		67.548		1.483
	65.398		14.836
	76.036		14.338
	41.485		24.77
	84.024		15.607
	35.179		33.603
	77.4683		17.588
	68.1233		18.177
	76.3573		18.908
	82.3703		13.898
	65.2373		16.94
	75.0963		23.359
	68.7343		15.285
	55.1433		13.889
	79.2003		15.137
	64.7443		15.393
	84.0673		14.432
	76.7233		15.068
	52.0043		18.496
	67.7083		20.735
	78.4883		22.55
	82.542		10.598
	73.012		13.219
	71.723		14.918
	69.537		20.867
	80.152		21.221
	81.33		12.631
	79.842
	81.763
	79.631
	55.428
	46.634
	59.311
	82.924
	81.058
	82.807
	84.867
	65.094
	75.578
	61.418
0.979	56.011	8.945	2.387
1.207	13.99	6.253	1.672
1.137	5.393	15.556	3.062
1.35	30.027	10.207	2.562
1.235	12.817	2.295	1.648
1.349	36.184	2.847	1.57
2.373	23.183	6.045	2.022
1.231	22.119	8.437	2.738
1.265	20.692	19.437	2.769
1.367	16.865	8.919	2.111
1.494	38.122	18.467	44.497
2.506	8.765	3.962	1.248
1.108	48.835	10.948	1.368
1.638	58.424	13.194	1.456
1.188	38.679	7.357	1.072
1.125	33.041	18.22	1.421
1.706	49.527	17.825	1.333
2.047	12.382	17.812	0.952
1.402	33.821	6.227	1.404
1.573	14.275	11.681	1.218
1.486	34.352	3.192	1.224
2.734	24.785	13.289	1.982
1.423	40.858	21.017	2.49
1.797	17.679	8.302	1.869
1.296	28.161	8.851	2.38
1.306	15.297	5.945	3.402
1.42	39.723	2.635	2.598
1.275	32.952	11.327	2.359
2.312	7.933	7.684	2.704
2.253	23.832	2.422	2.697
1.285	26.719	3.194	2.358
1.205	29.879	6.753	1.918
1.899	27.942	9.505	1.596
2.224	15.263	3.76	1.567
2.76	8.241	8.366	1.424
1.357	7.493	9.849	1.518
1.795	13.144	15.589	3.221
5.19	26.753	5.13	1.691
1.686	7.266	9.302	3.776
1.422	14.352	3.391	1.534
1.428	39.506	2.538	1.727
1.504	15.751	5.301	1.547
1.9	26.161	13.44	2.164
1.42	7.442	12.917	1.293
1.351	14.234	3.486	2.052
1.461	39.292	2.438	1.545
1.419	16.354	8.87	3.441
2.621	27.218	3.227	1.289
1.622	17.709	3.072	2.423
2.782	15.228	6.618	2.767
1.569	38.868	11.293	2.327
2.757	31.896	2.184	1.623
1.316	7.554	11.29	2.049
2.091	14.02	9.16	1.523
1.607	26.893	2.459	1.309
1.596	29.644	8.709	2.884
1.444	26.158	19.226	1.684
2.018	7.253	9.744	0.616
2.37	7.924	4.315	2.563
2.341	28.361	18.615	1.129
1.866	13.833	3.257	1.68
1.521	24.905	3.617	1.446
1.673	8.052	11.464	1.052
1.871	22.659	6.703	1.031
1.702	3.239	3.334	2.691
1.107	29.258	2.192	1.642
2.292	17.462	10.378	1.518
1.804	6.671	8.046	2.007
1.521	14.785	2.888	1.624
2.364	12.469	3.442	1.807
1.337	9.441	14.106	1.575
1.185	14.243	8.523	1.935
2.816	5.052	5.617	1.83
1.507	17.094	8.302	1.831
2.075	14.805	10.273	3.01
1.24	16.42	9.514	2.649
3.694	25.839	10.617	3.658
2.73	6.768	12.389	1.797
1.493	28.831	2.977	1.396
1.869	4.819	2.947	1.055
4.57	18.805	3.605	1.764
1.441	16.817	2.356	1.423
1.413	28.045	5.874	1.636
1.694	17.913	3.469	1.987
3.442
3.04
2.584
2.548
4.867
2.38
2.835
2.172
