# Supplementary material for: Neuronal hyperexcitability is a DLK-dependent trigger of herpes simplex virus reactivation that can be induced by IL-1
Source: eLife. 2020 Dec 22;9:e58037. doi: 10.7554/eLife.58037 (PMC7773336; doi:10.7554/eLife.58037)
Supplement: Figure 3—source data 1. [file elife-58037-fig3-data1.xlsx]

## Sheet: Figure 3
3A						3C					3D					3E				3F
0	5	10	15	20		Mock	Fsk	Fsk+OG	Fsk+S2101		Mock	Fsk	Fsk+OG	Fsk+S2101		Mock	Fsk	Fsk+GSK-J4		Mock	Fsk	Fsk+GSK-J4
14.2857	0	40				1	2.52	2.442	2.067		1	2.741	8.478	5.101		1	2.356	3.102		1	0.728	1.905
50	50	28.5714				0.669	3.895	1.73	1.465		0.594	4.057	4.923	3.238		1.288	2.972	3.293		0.414	0.389	3.865
0	75	0				0.469	3.015	1.782	1.361		0.181	4.484	4.611	1.225		2.257	3.625	4.781		2.241	0.981	14.267
0	50	60				1	3.83	2.412	1.715		1	5.381	1.302	1.731		1	10.508	9.284		1	15.598	4.744
25	0	50				2.386	2.33	2.687	2.63		1.094	2.305	3.635	2.749		0.795	8.555			2.487	7.846	17.51
28.5714	100	60				0.539	4.647	3.767	2.267		0.365	3.226	3.476	2.567		1	3.551	4.627		1.77	7.942	25.493
0	33.3333	25				1	2.539	2.357	2.669		1	4.488	4.221	1.962		2.07	2.917	7.919		0.378	12.853	20.573
33.3333	40	25				0.948	2.919	2.533	2.394		1.365	3.654	3.806	2.12		1.102	3.361	5.911
25	25					1.136	2.348	2.412	2.729		0.288	1.381	2.655	1.739		1.251	4.233	8.268
	66.6667					1	3.405	2.503	3.417		1	11.665	10.321	23.351
	0					0.775	3.586	2.899	3.784		0.774	15.335	11.268	11.758
	80					0.52	2.838	2.756	3.527		0.286	9.296	4.887	11.497
						0.371	2.418	1.793	3.428		2.109	1.892	13.517	30.434
50	60	100	100	50
66.6667	100	33.3333	66.6667	100
0	60	100	33.3333	100
0	100	0	50	100
0	50	75	0	0
33.3333	50	0	0	100
50	83.3333		33.3333	75
	33.3333			75
