# Supplementary material for: Neuronal hyperexcitability is a DLK-dependent trigger of herpes simplex virus reactivation that can be induced by IL-1
Source: eLife. 2020 Dec 22;9:e58037. doi: 10.7554/eLife.58037 (PMC7773336; doi:10.7554/eLife.58037)
Supplement: Figure 4—figure supplement 1—source data 1. [file elife-58037-fig4-figsupp1-data1.xlsx]

## Sheet: Figure S4
A				B				C				D
Mock	FSK	FSK + Iva		Mock	FSK	FSK + CsCl		Mock	Fsk	Fsk+ZD		Mock	Fsk	Fsk+ZD
40	650	220		10	753	5		1	2.639	0.487		1	2.741	0.636
78	277	113		7	93	17		0.411	1.625	0.514		0.594	4.057	0.445
16	450	98		2	41	10		1.769	4.494	0.225		0.181	4.484	0.132
2	5	0		2	74	5		1	6.199	2.55		1	11.665	2.231
2	73	7		2	180	6		1.833	8.289	0.651		0.774	15.335	2.367
0	15	2		3	43	13		0.96	2.548	2.155		2.109	1.892	2.051
106	300	74		1	180	11		0.393	3.32	2.699		0.286	9.296	4.32
38	18	95		4	86	35
6	181	89		2	182	20
108	190	140		2	295	13
40	175	160
2	476	0
0	382	20
0	560	45
