# Supplementary material for: Neuronal hyperexcitability is a DLK-dependent trigger of herpes simplex virus reactivation that can be induced by IL-1
Source: eLife. 2020 Dec 22;9:e58037. doi: 10.7554/eLife.58037 (PMC7773336; doi:10.7554/eLife.58037)
Supplement: Figure 4—source data 1. [file elife-58037-fig4-data1.xlsx]

## Sheet: Figure 4
4A				4B				4C				4D				4E			4F
Mock	Fsk	Fsk+TTX		Mock	Fsk	Fsk+TEA		Mock	Fsk	Fsk+ZD		Mock	Fsk	Fsk+ZD		FSK	FSK + ZD		Fsk	Fsk + ZD
2	87	53		2	41	6		1	53	0		1	2.52	0.719		68.19	31.5		3184.65	2053.33
3	171	55		2	195	15		0	8	3		0.669	3.895	0.715		77.1	79.78		1215.44	871.86
4	219	53		2	221	4		2	250	88		0.469	3.015	0.709		68.87	21.8		1148.9	828.18
3	30	17		2	87	2		3	350	250		1	3.405	1.583		68.93	22.6		1084.37	786.8
0	90	7		3	171	2		1	275	26		0.775	3.586	1.16		63.37	20.855		1084.25	753.9
0	120	24		4	219	1		1	275	49		0.52	2.838	1.959		77.27	54.3		1068.76	707.28
0	27	0		2	225	45		1	23	28		0.371	2.418	1.818		53.77	16.03		1028.78	680.67
1	23	5		1	200	43		0	20	9						74.17	23.696		1022.81	679.13
0	20	135		0	225	39		12	225	40						77.16	40.2		1000.34	665.93
12	225	63		3	325	16		1	70	13						62.68	7.737		998.62	658.05
1	70	37		1	275	12		0	103	39						59	26.9		991.98	657.36
4	209	18		5	35	70		0	0	41						66.3	13.9		981.06	654.53
7	312	48						1		0						75.5	38.6825		974.24	648.02
10	143	80						40	650	172						62.6	71.682		973.17	641.54
								78	277	26						70.76	21.6		961.62	593.65
								16	450	109						65.7	8.87		957.4	581.43
								1	180	35						39	32.2		956.13	577.2
								4	86	76						50.1	18.24		955.08	574.04
								2	182	37						51.6	27.8		952.96	570.14
								2	295	25						53.3	22.8		950.56	564.47
																84.14	7.13		947.55	558.4
																81.8	40		944.47	552.24
																62.67	48.1		940.98	552.06
																84.916	46.8		940.32	550.82
																84.016	17		936.76	536.57
																80.347	32.37		933.66	534.78
																40.3	39.74		933.07	533.71
																41.77	30.9		931.16	531.07
																44.4	52.6		925.75	531.01
																64.4	48.2		921.57	530.26
																77.6	39.393		920.09	528.82
																79.465	51.093		919.02	523.83
																82.195	75.36		917.97	522.57
																60.331	64.76		916.28	521.83
																48.869	57.09		914.86	519.93
																79.876	55.39		908.3	518.74
																65.398	29.59		906.98	518.51
																76.036	34.48		898.57	517.92
																41.485	39.695		897.88	515.32
																84.024	53.14		896.04	515.28
																35.179	37.44		892.87	513.6
																77.4683	44.6		889.4	513.54
																68.1233	18.3		886.06	512.33
																76.3573	58.4		884.49	512.21
																82.3703	52		882.83	511.6
																65.2373	66.894		881.17	510.11
																75.0963	57.834		877.56	508.36
																68.7343	41.774		876.9	507.45
																55.1433	58.29		870.39	507.22
																79.2003	29.599		868.48	506.89
																64.7443	43.38		864.58	506.36
																84.0673	45.807		864.48	504.02
																76.7233	43.178		863.75	502.96
																52.0043	68.637		863.63	502.88
																67.7083	33.677		863.07	500.58
																78.4883	4.106		860.23	498.47
																82.542	28.978		858.72	497.84
																73.012	33.386		857.85	497.75
																71.723	30.381		856.91	497.07
																69.537	33.143		854.68	496.72
																80.152	41.148		854.1	495.58
																81.33	32.05		853.48	494.19
																79.842	49.597		852.48	494.14
																81.763	51.21		852.28	493.53
																79.631	69.294		848.37	492.67
																55.428	47.311		847.14	491.69
																46.634	80.115		846.94	489
																59.311	33.988		846.62	487.87
																82.924	80.194		845.25	487.32
																81.058	30.953		844.76	484.47
																82.807	37.039		844.11	483.73
																84.867	22.701		842.38	483.51
																65.094	28.446		842.3	483.25
																75.578	22.368		841	483.2
																61.418	46.506		839.04	482.98
																17.417	2.053		838.13	482.26
																12.621	2.053		835.66	481.72
																1.537	1.44		833.99	478.77
																49.115	1.358		832.81	478.08
																15.477	4.081		831.58	477.64
																28.608	36.994		829.99	477.64
																18.027	9.603		828.93	476.95
																26.957	0.741		828.39	476.74
																20.94	12.571		826.25	476.13
																42.958	8.701		826.1	475.72
																17.423	0.851		825.8	474.82
																26.048	10.668		825.31	473.65
																42.733	4.227		824.83	472.37
																35.238	2.945		824.79	472.29
																18.793	2.495		824.73	471.57
																19.965	1.9		823.22	469.92
																62.351	64.234		822.95	469.59
																29.971	48.471		822.22	469.46
																26.415	5.41		821.14	468.85
																7.445	13.313		821.11	468.84
																29.711	5.981		819.49	467.54
																28.002	60.874		819.39	466.6
																28.227	0.937		818.23	466.15
																25.407	42.883		818.08	465.65
																43.288	2.628		815.37	464.78
																17.075	7.667		811.85	464.74
																20.397	1.651		810.8	464.26
																42.917	25.555		809.08	464.04
																23.291	2.628		806.86	463.87
																47.766	3.158		806.79	463.86
																28.343	19.223		806.21	463.33
																36.621	7.043		805.27	462.24
																15.293	6.734		804.43	458.27
																16.876	3.085		803.63	458.19
																17.174	6.575		801.24	458.17
																24.659	3.171		799.72	458.01
																59.701	41.327		797.95	457.24
																25.949	3.711		797.89	457.05
																21.985	12.818		797.08	456.95
																24.958	55.558		796.42	456.84
																20.941	11.874		794.88	456.65
																3.583	2.216		794.61	456.61
																16.349	8.106		794.27	454.81
																7.599	0.725		791.75	454.79
																3.195	2.77		791.73	452.95
																5.028	2.509		790.19	450.75
																30.443	3.668		789.64	450.39
																24.288	24.779		789.43	449.83
																2.791	4.175		789.02	449.78
																15.683	2.962		788.48	447.86
																17.46	6.461		787.93	447.85
																6.133	8.405		786.39	447.06
																9.595	9.56		785.59	446.8
																21.417	4.48		785.36	443.9
																19.99	7.146		784.7	443.43
																6.51	13.876		781.74	443.33
																14.669	22.157		779.48	443.14
																5.698	3.149		779	442.85
																22.07	3.054		778.4	441.66
																5.215	4.379		776.42	440.93
																27.254	14.299		770.84	440.58
																9.509	2.837		770.83	439.58
																23.756	30.767		770.73	439.34
																10.323	1.909		770.37	439.33
																4.073	5.235		769.39	438.51
																10.761	4.333		769.28	437.62
																8.34	24.134		768.94	437.06
																18.003	28.394		768.54	436.52
																9.769	6.438		765.12	436.11
																15.894	4.682		765.12	436.06
																21.439	5.551		763.64	433.48
																32.469	17.297		763.6	432.5
																4.279	25.18		761.08	432.44
																30.671	6.633		760.52	432.4
																39.229	11.037		756.82	431.75
																44.383	3.655		755.86	427.44
																42.013	17.744		754.63	426.92
																31.86	5.336		753.83	426.03
																29.411	1.441		751.21	424.53
																6.605	0.862		750.87	421.57
																26.993	2.875		749.6	421.35
																16.762	12.632		747.82	421.25
																5.813	6.137		746.22	420.74
																24.555	20.9		744.19	419.62
																17.248	25.171		744.17	419.47
																			742.55	417.93
																			741.54	415.63
																			741.19	414.02
																			741.03	413.38
																			740.85	413.08
																			737.99	413.02
																			737.95	412.98
																			736.55	412.59
																			735.43	410.63
																			735.33	410.21
																			735.05	409.81
																			735.01	409.57
																			733.98	409.54
																			733.38	409.03
																			730.53	408.52
																			727.07	408.37
																			726.83	403.05
																			726.02	397.78
																			724.15	396.88
																			723.81	396.17
																			721.3	395.91
																			719.52	395.15
																			718.45	395.09
																			717.48	385.39
																			717.02	382
																			716.11	380.76
																			715.79	378.78
																			715.16	376.35
																			713.04	373.91
																			711.1	371.4
																			710.38	370.32
																			709.31	355.47
																			707.48	342.9
																			705.56	331.4
																			704.85
																			703.07
																			702.84
																			702.37
																			701.47
																			701.02
																			700.12
																			699.91	1012.35
																			698.79	863.87
																			697.41	847.19
																			693.49	815.2
																			691.98	791.68
																			691.36	737.04
																			689.31	729.82
																			687.43	726.44
																			687.28	719.25
																			685.99	717.15
																			684.7	714.45
																			684	712.78
																			680.97	703.33
																			679.13	699.48
																			671.99	677.37
																			666.65	665.22
																			659.36	664.38
																			658.63	661.18
																			651.14	658.77
																			650.49	650.83
																			644.38	646.98
																			644.14	641.92
																			643.58	631.06
																			643.31	627.21
																			643.24	621.23
																			642.62	616.77
																			641.86	607.57
																			640.81	601.15
																			631.36	599.08
																			630.41	596.46
																			629.54	595.76
																			627.04	595.71
																			626.22	592.91
																			620.23	590.69
																			618.36	582.41
																			617.41	575.11
																			613.41	573.14
																			590.34	570.86
																			585.27	567.1
																			585.05	567.08
																			584.31	565.98
																			579.19	562.79
																			541.21	562.42
																			492.44	559.29
																				557.58
																				557.42
																				557.41
																				556.45
																				556.27
																				553.94
																				553.55
																				552.75
																			1709.21	551.84
																			1591.4	550.27
																			1429.51	550.07
																			1428.94	549.79
																			1395.1	549.62
																			1375.36	549.54
																			1363.91	547.6
																			1362.94	545.3
																			1258.08	543.92
																			1248.3	542.34
																			1241.95	541.7
																			1232.01	539.77
																			1227.99	538.94
																			1221.43	538.56
																			1184.51	537
																			1183.84	536.42
																			1169.09	536.08
																			1165.84	535.99
																			1164.31	535.95
																			1161	532.89
																			1155.06	531.41
																			1152.1	531.06
																			1145.13	530.94
																			1140.24	529.97
																			1138.37	529.9
																			1127.31	528.36
																			1126.23	528.18
																			1110.53	527.97
																			1100.53	527.09
																			1095.43	526.25
																			1091.92	526.12
																			1087.77	525.52
																			1086.35	524.88
																			1084.5	524.06
																			1081.86	523.67
																			1072.54	523.06
																			1064.51	523.01
																			1063.94	522.68
																			1062.43	522.68
																			1062.04	522.55
																			1061.19	522
																			1059.62	521.82
																			1058.55	521.74
																			1053.03	521.68
																			1050.07	521.15
																			1046.18	520.51
																			1044.29	518.33
																			1042.38	518.2
																			1037.47	517
																			1034.52	516.94
																			1029.03	515.48
																			1022.36	512.9
																			1020.46	512.84
																			1014.22	512.54
																			1007.36	512.17
																			1007.23	511.79
																			1004.42	511.06
																			1003.33	510.11
																			1001.97	509.52
																			1000.89	509.03
																			1000.8	508.66
																			999.12	508.12
																			997.55	506.75
																			986.64	504.89
																			986.4	504.79
																			985.83	503.9
																			984.72	502.09
																			979.75	501.85
																			975.63	501.63
																			975.19	500.92
																			973.5	500.81
																			973.43	500.22
																			972.67	499.97
																			971.35	498.7
																			966.98	498.62
																			966.45	498.28
																			964.4	496.85
																			961.87	496.75
																			961.35	495.1
																			959.01	493.63
																			955.52	493.37
																			955.31	492.28
																			954.95	492.27
																			953.33	491.67
																			953.12	491.46
																			952.99	490.82
																			951.66	490.04
																			948.65	489.53
																			948.3	489.46
																			946.79	486.68
																			946.62	486.59
																			944.28	485.92
																			943.91	485.09
																			943.26	484.96
																			941.19	484.44
																			939.54	483.76
																			938.97	483.44
																			937.72	483.18
																			936.61	482.67
																			935.89	482.65
																			933.61	481.6
																			932.09	479.36
																			929	478.63
																			925.04	477.55
																			924.42	474.55
																			916.94	473.9
																			910	472.74
																			909.57	470.84
																			904.43	467.37
																			900.33	463.82
																			898.45	463.24
																			897.17	463.13
																			892.76	462.35
																			890.77	462.11
																			890.07	458.08
																			882.24	457.64
																			881.27	457.3
																			880.88	450.33
																			878.83	449.72
																			869.11	448.54
																			866.83	445.98
																			863.27	443.82
																			860.93	442.29
																			853.77	440.59
																			851.29	438.86
																			850.82	438.49
																			848.6	437.98
																			848.32	435.51
																			847.7	435.03
																			846.82	434.31
																			840.83	430.16
																			836.7	429.5
																			836.28	427.13
																			835.49	426.29
																			827.28	426.16
																			825.03	422.77
																			825.01	419.7
																			823.04	416.16
																			821.45	414.27
																			820.07	406.42
																			809.66	406.27
																			805.23	405.69
																			802.74	401.28
																			796.58	385.82
																			792.79	383.08
																			789.84	381.95
																			777.45	378.06
																			775.64	361.14
																			773.42
																			765.54
																			762.62
																			762.49
																			758.68
																			755.77
																			753.74
																			737.66
																			734.04	564.37
																			732.69	558.56
																			728.62	548.69
																			706.88	541.46
																			648.6	541.17
																			600.51	525.16
																				523.34
																				522.22
																				519.67
																				517.69
																				515.65
																				503.82
																				501.49
																			1836.51	500.53
																			1470.45	498.49
																			1349.24	493.95
																			1182.78	490.15
																			1171.41	489.07
																			1075.25	487.83
																			1066.37	485.72
																			1063.71	485.7
																			997.54	483.56
																			959.21	482.92
																			952.5	481.47
																			942.45	474.58
																			941.04	474.22
																			933.16	473.63
																			929.06	471.12
																			924.25	468.22
																			906.19	468.07
																			899.62	467.94
																			887.49	467.54
																			887.06	467.14
																			874.34	463.92
																			868.77	463.38
																			865.73	463.19
																			861.85	462.16
																			851.44	461.41
																			838.51	461.07
																			836.79	460.6
																			834.3	460.44
																			834.2	457.23
																			831.52	455.5
																			827.55	453.98
																			825.52	453.05
																			821.75	452.73
																			820.4	452.51
																			817.91	452.33
																			817.3	452.27
																			816.87	451.8
																			804.68	451.59
																			804.04	450.03
																			803.16	447.94
																			797.33	447.33
																			785.56	447.18
																			784.85	446.98
																			782.77	446.23
																			782.37	446.23
																			781.93	445.52
																			778.5	444.99
																			777.36	444.91
																			776.98	444.12
																			775.18	444.08
																			773.64	443.99
																			773.35	443.88
																			770.96	443.79
																			766.45	443.58
																			764.33	441.9
																			763.28	441.43
																			759.17	440.93
																			758.6	440.02
																			756.4	439.91
																			754.1	439.01
																			751.94	438.66
																			751.87	437.84
																			750.19	437.68
																			750.13	437.32
																			748.54	437.14
																			747.12	436.98
																			746.96	436.78
																			746.54	436.43
																			745.79	436.42
																			744.03	436.31
																			743.8	436.29
																			742.86	435.68
																			740.59	434.84
																			739.52	434.39
																			739.04	434.34
																			737.99	434.26
																			736.66	434.22
																			736.29	434.01
																			732.47	433.52
																			732.41	433.5
																			729.61	432.73
																			728.19	432.38
																			725.17	431.94
																			724.12	431.91
																			723.92	430.88
																			723.43	430.31
																			718.7	430.31
																			714.93	429.37
																			713	429.03
																			711.36	428.53
																			710.82	427.88
																			708.37	427.41
																			705.51	424.29
																			703.76	423.76
																			700.84	423.58
																			699.29	423.44
																			698.63	423.38
																			698.09	421.91
																			696.38	421.53
																			696.29	421.5
																			695.22	420.17
																			695.08	419.99
																			693.8	419.91
																			692.62	419.42
																			692.44	418.59
																			691.59	418.34
																			690.4	418.18
																			689.68	417.79
																			688.02	417.59
																			687.44	417.55
																			686.62	417.31
																			686.59	417.3
																			685.47	417.2
																			684.31	416.95
																			684.29	416.34
																			682.85	415.77
																			682.69	415.72
																			682.31	415.23
																			682.1	414.58
																			681.38	414.19
																			680.9	414.11
																			680.86	410.4
																			680.85	409.9
																			680.16	409.58
																			679.11	408.98
																			678.55	408.28
																			678.03	408.1
																			677.74	407.69
																			675.34	407.53
																			673.36	407.07
																			673.23	406.8
																			672.03	406.36
																			669.56	406.19
																			667.02	404.69
																			666.98	404.22
																			666.85	404.08
																			666.76	403.11
																			665.68	402.97
																			663.68	402.75
																			662.18	402.73
																			659.95	402.14
																			659.24	401.29
																			658.08	400.35
																			655.26	400.09
																			655.12	399.86
																			654.48	399.85
																			654.14	399.8
																			652.86	399.75
																			651.68	399.23
																			650.03	398.65
																			649.2	397.81
																			646.75	397.57
																			645.97	397.34
																			642.26	397.28
																			641.15	396.71
																			639.01	396.42
																			638.02	393.88
																			634.16	393.87
																			630.54	393.75
																			629.45	392.94
																			628.74	390.95
																			626.18	388.49
																			626.07	387.86
																			624.84	386.53
																			622.62	386.22
																			620.66	385.99
																			619.6	383.35
																			618.96	381.75
																			617.29	379.18
																			613.79	376.21
																			611.72	375.04
																			609.78	368.51
																			609.71	366.46
																			609.37	361.51
																			608.44	361.2
																			607.99	357.5
																			605.04
																			602.46
																			601.91
																			601.85
																			598.55
																			594.42
																			594.2
																			593.5	536.79
																			591.04	531.91
																			590.83	520.78
																			588.12	505.66
																			584.44	501.1
																			582.94	501.05
																			581.62	496.91
																			581.06	493.11
																			580.69	484.22
																			577.69	484.05
																			577.56	481.05
																			575.91	480.21
																			575.34	479.75
																			572.28	478.12
																			570.45	476.83
																			569.65	475.81
																			569.09	475.06
																			561.92	474.76
																			554.8	472.27
																			543.56	470.78
																			542.08	469.48
																			529.6	469.38
																			528.34	468.67
																				467.25
																				467.25
																				466.88
																				466.36
																				463.2
																				462.74
																				462.68
																			1428.76	462.39
																			1124.35	460.33
																			1087.04	459.94
																			1047.22	456.47
																			1041.54	455.95
																			1039.6	455.73
																			1027.22	455.27
																			1003.08	455.12
																			996.85	453.25
																			988.44	452.16
																			960.46	451.69
																			955.47	451.56
																			941.06	449.48
																			939.23	446.27
																			934.43	444.2
																			927.2	443.37
																			924.71	443.31
																			923.49	442.29
																			920.41	441.66
																			917.59	440.91
																			915.74	439.59
																			912.64	439.47
																			912.54	438.03
																			907.19	437.75
																			906.54	437.25
																			902.29	435.65
																			901.19	435.28
																			899.61	434.79
																			899.6	433
																			896.79	432.62
																			895.9	431.79
																			895.29	431.64
																			887.31	431.33
																			880.15	430.99
																			878.44	430
																			877.94	429.92
																			870.61	429.04
																			870.52	428.45
																			868.51	428.26
																			868.37	427.41
																			868.18	427.1
																			866.74	427.03
																			866.66	426.15
																			866.47	424.93
																			865.88	424.89
																			862.7	424.09
																			862.01	422.54
																			860.94	421.15
																			860.47	419.42
																			859.22	419.29
																			859.04	418.75
																			854.98	418.63
																			854.33	417.64
																			854.07	416.27
																			849.62	415.84
																			848.94	411.36
																			848.77	410.4
																			848.51	410.15
																			848.46	409.75
																			846.62	409.75
																			846.38	407.49
																			844.79	407.47
																			843.88	406.96
																			843.17	406.22
																			842.89	404.33
																			841.15	403.91
																			839.51	401.21
																			838.1	399.49
																			836.37	397.02
																			835.85	396.57
																			832.75	396.16
																			831.75	395.54
																			828.51	394.71
																			828.07	394.23
																			823.75	392.5
																			823.23	391.64
																			822.66	388.33
																			821.3	387.56
																			821.19	385.73
																			817.48	385.22
																			815.84	384.76
																			814.83	384.61
																			812.57	375.54
																			812.16	375.18
																			810.83	373.82
																			810.63	372.69
																			810.21	368.39
																			808.6	360.98
																			807.78	336.33
																			805.72	306.73
																			804.64
																			803.57
																			801.27
																			800.01
																			799.74
																			799.6
																			790.64
																			788.44	811.01
																			784.5	663.99
																			781.97	653.27
																			780.6	648.85
																			779.97	647.2
																			778.9	635.66
																			777.12	590.3
																			776.4	585.84
																			774.76	578.24
																			772.61	573.06
																			764.17	564.03
																			763.56	554.85
																			761.33	554.69
																			758.18	553.27
																			757	546.69
																			754.08	544.41
																			750.03	543.33
																			739.18	527.39
																			730.91	523.49
																			727.68	522.94
																			723.07	522.17
																			715.68	521.76
																			711.01	513.23
																			709.25	511.06
																			707.65	508.03
																			702.29	503.46
																			689.91	500.98
																			688.66	495.37
																			681.04	494.93
																			664.64	494.26
																			652.16	493.64
																			651.18	492.25
																			647.85	492.02
																			632.4	489.89
																			630.73	486.05
																			613.4	485.56
																			609.42	485.53
																			576.69	485.5
																			500.36	484.77
																				482.76
																				482.73
																				482.6
																				482.35
																				480.63
																				479.29
																				479.12
																			9502.63*	478.55
																			1573.91	477.09
																			1492.83	476.82
																			1248.66	474.47
																			1180.17	473.5
																			1138.88	471.38
																			1111.36	471.01
																			1109.67	467.91
																			1109.17	467.22
																			1073.97	465.2
																			1070.47	465.11
																			1063.78	462.33
																			1047.86	461.78
																			1020.98	461.74
																			1010.06	461.21
																			1007.31	461.16
																			997.69	461.1
																			997.53	460.95
																			977.67	460.88
																			962.3	460.38
																			955.85	459.84
																			947.4	459.82
																			945.08	458.53
																			944.79	457.65
																			940.59	457.51
																			936.98	457.09
																			929.04	456.05
																			921.09	454.54
																			921.01	454.05
																			915.68	453.97
																			909.41	453.96
																			905.25	452.25
																			899.48	451.66
																			893.64	451.21
																			891.77	450.07
																			887.93	449.97
																			887.21	449.38
																			883.78	447.87
																			878.28	447.6
																			876.44	447.53
																			876.11	446.73
																			874.73	445.77
																			872.25	445.72
																			872.23	443.72
																			871.77	443.57
																			869.65	442.06
																			869.63	439.44
																			867.02	438.26
																			866.31	436.91
																			862.86	435.99
																			860.39	434.48
																			859.21	434.28
																			856.66	431.44
																			855.78	430.54
																			855.76	430.46
																			853.69	429.46
																			852.14	428.1
																			850.33	427.9
																			845.69	427.78
																			844.58	427.5
																			843.75	427.34
																			837.59	426.44
																			832.83	426.21
																			831.53	426.07
																			831.08	425.93
																			829.75	424.54
																			829.12	422.99
																			827.78	422.69
																			827.27	421.86
																			824.43	421.63
																			822.68	421.36
																			821.34	421.21
																			821.33	421.1
																			818	420.65
																			816.39	418.15
																			813.23	417.88
																			810.17	417.74
																			809.75	416.91
																			808.73	415.35
																			806.71	415.12
																			805.97	415.05
																			804.67	413.06
																			802.54	411.36
																			802.27	409.77
																			799.58	406.22
																			799.4	405.56
																			797.55	405.26
																			793.23	403.25
																			791.88	400.66
																			791.64	400.34
																			789.85	396.59
																			788.19	395.82
																			785.6	395.25
																			780.88	394.87
																			772.28	394.42
																			770.1	392.8
																			768.72	392.09
																			764.08	391.01
																			759.55	389.23
																			758.74	382.31
																			758.68	379.33
																			749.49	377.88
																			749.28	377.13
																			742.36	376.98
																			739.63	367.06
																			737.78	351.59
																			735.21	327.56
																			734.83	300.27
																			730.96
																			728.17
																			722.07
																			720.91
																			717.77
																			716.01
																			714.24
																			707.21
																			700.09
																			698.06
																			696.78
																			692.85
																			692.74
																			692.19
																			688.34
																			687.2
																			681.72
																			680.94
																			680.35
																			679.76
																			673.71
																			672.64
																			667.08
																			664.39
																			656.94
																			654.99
																			653.46
																			652.95
																			649.43
																			648.39
																			643.97
																			633.19
																			631.27
																			630.62
																			626.23
																			624.08
																			622.19
																			611.76
																			603.09
																			601.9
																			589.97
																			583.23
																			577.58
