# Supplementary material for: Neuronal hyperexcitability is a DLK-dependent trigger of herpes simplex virus reactivation that can be induced by IL-1
Source: eLife. 2020 Dec 22;9:e58037. doi: 10.7554/eLife.58037 (PMC7773336; doi:10.7554/eLife.58037)
Supplement: Figure 5—source data 1. [file elife-58037-fig5-data1.xlsx]

## Sheet: Figure 5
5A																																												5B
	Mock									0.5h					1h					8h													72h											0.5h1h	TTX Release	TTX Release+SP600125	TTX Release+Gne3511
FSK	1	0	0	1	1	3	1	2		7	8	10	0	9	2	5	5	1	4	47	3	2	6	5	125	175	3	200	21	15	27	7	53	8	70	225	170	52	200	150	300	150		1	214	95	14
KCl	1	0	0	1	1	3	1	2		3	2	18	2	0	1	0	1	3	0	13	150	95	175	50	130	40	250	100	90	41	56	9	75	26	135	170	110	120	75	125	150	130		16	933	17	1
																																												4	75	2	5
																																												2	776	4	2
																																												0	2	0	5
																																												2	68	0	1
																																												1	122	3	2
																																												1	93	9	0
																																												3	107	250	1
																																												0	600	1	2
																																												9	300	11	3
																																												5	500	16	16









[truncated: 3 more columns]
