# Supplementary material for: Neuronal hyperexcitability is a DLK-dependent trigger of herpes simplex virus reactivation that can be induced by IL-1
Source: eLife. 2020 Dec 22;9:e58037. doi: 10.7554/eLife.58037 (PMC7773336; doi:10.7554/eLife.58037)
Supplement: Figure 6—figure supplement 1—source data 1. [file elife-58037-fig6-figsupp1-data1.xlsx]

## Sheet: Figure S6
A					B
0	5	10	15		0	5	10	15
1040.64	1941.25	3323.77	7434.05		908.65	1229.98	1551.01	2144.66
916.04	2370.62	3250.04	7027.16		945.52	1254.08	1528.1	1842.55
1051.64	2798.01	3229.73	4661.68		969.72	1240.68	1517.13	1717.89
936.14	2338.93	3184.75	4048.5		1059.94	1227.49	1510.42	1709.5
935.32	2833.55	3119.32	4042.45		916.31	1247.74	1485.56	1693.07
943.46	2472.27	3075.77	3988.05		917.88	1281.79	1469.94	1678.47
899.62	3329.96	3053.94	3952.7		902.42	1305.26	1410.78	1659.59
1008.42	2443.58	3041.05	3940.79		914.36	984.22	1407.87	1623.43
961.21	1647.6	3039.11	3792.26		1001.49	1238.69	1406.14	1606.67
987.64	2277.65	3033.43	3790.88		1081.2	1291.39	1404.18	1605.25
839.71	2509.69	2964.71	3774.2		973.78	1705.85	1403.85	1584.75
924.16	2458.44	2917.53	3762.43		1036.15	1067.83	1394.34	1579.68
1044.67	3151.65	2916.83	3759.88		996.02		1391.41	1536.71
926.05	2582.04	2911.95	3711.94		1098.24		1381.71	1524.57
873.57	2678.64	2886.1	3695.65		936.37		1380.59	1524.38
1010.08	869.06	2849.87	3693.4		977.83		1379.64	1520.14
1111.09		2849.55	3680.44		1061.47		1376.43	1518.15
993.09		2814.42	3632.16		938.66		1364.21	1517.95
1012.75		2774.48	3619.59		1181.51		1357.8	1517.58
959.52		2760.67	3617.08		1010.24	830.58	1349.69	1514.2
785.12		2713.89	3562.83		967.32	967.96	1340.34	1506.33
1055.33		2713.38	3559.71		1015.02	1157.61	1340.24	1491.29
890.28		2703.75	3545.25		967.27	1155.94	1333.3	1481.41
938.17	1687.3	2699.75	3545.22		1056.14	1102.05	1322.99	1472.41
874.66	2055.15	2679.71	3459.83		1064	1065.31	1321.86	1467.85
990.31	2499.89	2646.26	3453.18		1053.75	1096.45	1317.48	1462.66
914.93	2549.28	2634.49	3449.74		996.47	1125.98	1311.8	1452.4
1025.28	2269.83	2627.05	3435.49		1064.86	1161.59	1310.59	1448.32
951.1	2095.13	2609.55	3425.14		1011.63	1057.02	1309.17	1443.31
994.41	2217.46	2606.4	3368.92		987.89	1014.11	1301.98	1442.6
1137.66	2248.4	2598.91	3356.98		1032.04	1249.9	1293.32	1442.3
971.02	2585.07	2593.1	3338		1211.63	1096	1289.47	1430.78
948.18	2252.21	2584.12	3316.82		1077.41	1086.64	1263.9	1428.99
724.3	2205.45	2536.01	3308.36		1023.74	1149.18	1263.79	1427.49
1044.43	2131.49	2533.21	3298.21		1200.94	1101.36	1254.84	1422.8
816.82	2211.14	2529.53	3290.72		1102.79	1327.41	1253.68	1410.51
739.28	2263.76	2522.5	3263.71		959.83	1162.68	1243.33	1399.11
890.86	2418.97	2502.95	3251.04		915.3		1226.85	1392.74
725.89	2590.4	2492.43	3179.15		963.16		1209.78	1365.36
	2205.07	2460.35	3089.79				1206.57	1327.37
	2437.2	2444.91	3066				1203.42	1300.08
		2444.79	3018.34				1186.89	1274.63
		2426.99	3017.98				1171.56	1269.4
		2422.5	2932.98				1164.7	1264.71
		2405.81	2859.69			1650.09	1135.71	1243.6
		2334.21	2754.38			763.17	1120.67	1220.47
1022.82		2236.8	2753.3		913.67	845.26	1117.51	958.35
971.22		2226.9	2479.12		904.51	933.82	1067.27	697.31
1370.67		2196.17	779.53		1014.72	974.47	1013.27
1044.51	7984.25	2144.73			883.75	769.4	964.92
914.2	1273.64	2040.25			858.05	1072.24
1159.86	1811.15				885.29	977.63
956.11	1929.51				842.66	1052.58
802.05	1892.35				882.21	1009.17
881.44	998.25				1014.23	1190.9
716.7	2072.74				846.26	1119.82
816.72	1923.28				875.79	1040.48
1002.55	2139.59				911.71	1086.89	1517.13	1954.45
791.24	1698.88	4097.25			842.91	1030.22	1498.63	1863.34
718	2236	3432.24			850.29	859.06	1474.15	1788.2
817.13	2030.28	3400.53			884.53	937.55	1436.92	1737.18
802.63	1992.38	3236.66			858.51	1182.93	1427.83	1737.09
863.88	2581.88	3189.26			903.43	1106.09	1423.38	1708.99
771.61	2064.24	3137.53			806.03	1049.06	1420.94	1699.17
973.08	1413.38	3101.37			846.11	979.59	1410.2	1630.71
482.53	2416.77	3071.72			791.6	1024.09	1367.14	1615.05
560.58	2380.07	3065.29			801.5	873.12	1365.34	1604.65
	2021.52	3045.4				1123.17	1358.62	1598.92
	2463.41	2973.91				1067.8	1357.61	1589.04
	2380.36	2947.51				1088.92	1351.4	1552.17
	1884.82	2923.52				1223.41	1350.45	1529.16
	1616.4	2920.45				1157.13	1349.34	1504.24
	2276.3	2902.6				796.49	1349.1	1499.75
	2478.1	2899.1				844.3	1345.76	1498.48
1075.84	2008.87	2894.46			1210.16	834.6	1322.03	1495.38
1183.08	2070.41	2864.73			1218.65	837.59	1320.72	1494.21
4755.94	2569.71	2851.83			1347.49	1061.24	1313.53	1483.06
970.13	1338.41	2843.78			1066.38	957.74	1311.25	1472.4
1124.03	1396.02	2836.94			1080.26		1310.26	1448.93
1835.84	1505.3	2830.11			1141.26		1301.87	1445.73
1316.08	1466.3	2829.15			1226.64		1293.1	1440.8
955.81	2126.75	2813.52			1069.88		1291.86	1403.23
1099.1	1499.63	2798.98			1069.32		1291.12	1360.6
1287.51		2775.97			1689.61		1285.9	1312.81
828.65		2751.69			921.93		1279.88	1300.09
1197.09		2741.73			1010.59	655.04	1277.16	1262.36
925.86		2720.23			1007.89	1029.93	1275.61	1258.87
1278		2708.8			1226.91	1006.69	1268.11	672.09
1213.16		2702.48			1428.51	1031.1	1264.99
1274.68		2697.68			1230.71	1020.04	1259.81
					1026.6	603.39	1253.65
					1236.9	723.74	1251.27
					1366.17	1013.56	1248.32
					1108.11	957.18	1231.06
					1796.95	1008.34	1220.07
					1271.71	1065.6	1202.27
					1245.11	1136.57	1190.54	2348.83
					1188.95	1155.4	1181.25	1972.3
					1062.89	876.33	1179.84	1752.88
					1468.48	793.28	1179.76	1749.09
					1111.84	977.59	1177.1	1677.39
					1222.26	838.72	1175.44	1638.01
					1285.68	957.32	1171.08	1598.21
					1169.82	1075.76	1165.79	1595.21
					1186.5	1053.78	1162.35	1567.54
					909.88	991.13	1144.72	1550.24
					1622.43	1032.55	1144.21	1541.28
					1215.89	1054.84	1142.67	1515.88
					1257.58	1010.03	1136.76	1510.11
						1242.75	1134.12	1483.44
						990.4	1119.98	1466.99
						1018.14	1097.57	1466.23
						1065.3	1094.31	1461.59
						984.92	1093.06	1443.74
						1040.74	1072.11	1439.67
						1088.02	1066.57	1402.33
					906.49	1008.41	1051.29	1391.92
					1178.91	1189.27	1022.68	1385.74
					1245.5	877.6	1014.43	1382.56
					1097.52	873.25		1382.11
					1108.58	1187.14		1380.79
					1049.48			1350.94
					1139.97			1342.17
					1114.81			1340.42
					1153.29			1338.38
					1343.94			1333.43
					1125.46			1320.98
					1232.94		1411.73	1282.81
					1085.04	900.99	1335.58	1232.85
					822.24	918.77	1295.49	1226.06
					1099.64	931.31	1290.44	1192.47
					1032.59	909.26	1277.96
					1106.15	803.44	1242.79
					1249.63	956.09	1237.16
					1116.03	1092.77	1206.38
					1028.9	998.36	1195.57
					939.98	957.39	1189.92
					1114.28	830.61	1189.1
					902.27	968.03	1171.39
					987.49	941.52	1171.04	1541.5
					1107.41	1078.72	1169.75	1484.49
					1164.51	914.1	1162.47	1387.13
						967.14	1152.71	1361.33
						912.85	1151.48	1360.39
						582.94	1131.15	1332.45
						899.66	1106.33	1329.8
						1081.2	1096.66	1323.43
						807.69	1071.4	1307.2
						1078.88	1067.16	1288.68
					751.6	1020.57	1037.89	1288.17
					792.38		978.76	1285.88
					762.21		877.42	1247.85
					827.7		665.65	1243.15
					752.02			1238.05
					843.05			1208.57
					887.28			1194.28
					949.92			1191.94
					760.43	1319.97		1132.95
					897.47	1078.3		1132.68
					981.02	1014.14		994.52
					1052.19	914.52	1955.9	688.7
					948.92	884.06	1856.84
					981.61	834.68	1502.8
					691.23	833.93	1465.96
					1460.13	831.83	1453.04
					812.52	827.56	1380.49
					698.28	814.77	1353.47
					1026.33	798.8	1334.62
					967.23	787.89	1315.89	2192.2
					952.19	777.46	1311.83	1726.28
						775.13	1303.41	1630.81
						772.89	1297.17	1592.35
						731.77	1289.01	1590.72
						692.46	1283.7	1516.83
							1254.27	1513.68
							1249.59	1509.77
							1246.29	1409.53
							1244.85	1308.08
							1234.66	1226.37
							1224.65	679.66
							1221.41
							1216.35
							1202.79
							1192.59
							1185
							1182.02
							1175.58
							1173.66
							1172.69
							1171.48
							1170.08
							1166.77
							1163.55
							1161.99
							1161.58
							1155.97
							1154.42
							1153.94
							1151.1
							1150.29
							1145.36
							1142.21
							1137.94
							1135.93
							1129.67
							1122.43
							1121.68
							1120.87
							1114.84
							1113.97
							1113.02
							1108.21
							1095.47
							1093.95
							1091.62
							1083.82
							1076.02
							1070.64
							1062.67
							1055.96
							1053.38
							1052.53
							1049.86
							1049.26
							1043.46
							1041.74
							1041.64
							1041.19
							1028.91
							1028.35
							1003.32
							958.44
							947.32
							738.59
