# Supplementary material for: Neuronal hyperexcitability is a DLK-dependent trigger of herpes simplex virus reactivation that can be induced by IL-1
Source: eLife. 2020 Dec 22;9:e58037. doi: 10.7554/eLife.58037 (PMC7773336; doi:10.7554/eLife.58037)
Supplement: Figure 6—source data 1. [file elife-58037-fig6-data1.xlsx]

## Sheet: Figure 6
6B										6E
Untreated	IL1	IL1+TTX	IL1 + IL1Rab		Untreated	IL1	IL1+TTX	IL1 + IL1Rab		Untreated	20hr	20hr +Antibody
79.3738	130.858	123.775	17.7272		366.175	953.899	447.539	22.2966		1.21518	1.04481
93.7608	140.024	99.8334	42.5152		400.811	1043.85	507.415	291.1		1.03523	1.22403	1.29624
130.557	127.962	81.9184	48.6602		516.17	900.641	454.613	378.557		0.907381	1.58378	1.03252
96.3938	178.482	121.324	78.9372		342.787	1135.95	462.502	439.804		1.0331	0.967032	1.20721
106.431	111.492	135.056	77.6792		424.149	760.946	483.117	287.91		0.864225	1.43839	1.13674
140.105	125.48	116.166	122.063		374.569	801.267	525.444	349.019		0.878597	1.18175	1.03708
147.94	95.6782	134.666	72.9022		374.71	820.969	358.811	431.57		1.37539	1.82289	1.17024
106.257	154.247	127.081	67.0992		441.993	917.161	502.179	291.194		0.971122	0.99626	0.896595
122.465	118.838	121.696	93.3472		459.583	1125.94	491.426	229.114		0.937967	1.26472	1.01239
143.501	129.916	127.627	95.4232		439.128	899.514	512.039	295.375		1.11915	0.795943	0.894834
199.27	186.858	124.145	94.6252		521.933	1190.76	505.645	317.173		0.81688	0.882065	1.31503
136.789	135.341	118.283	97.3512		227.701	931.862	208.958	172.072		0.845785	1.10585	0.942441
101.117	108.63	90.9614	106.421		356.873	988.243	480.637	218.09		1.22626	0.943148	0.948614
94.7038	169.349	96.7634	77.9692		401.62	924.884	371.717	407.207		1.13725	0.897064	0.974124
128.322	175.375	86.3574	61.7112		318.993	763.884	328.096	307.383		1.12586	1.47332	0.9387
185.427	142.496	90.127	139.938		481.217	1062.83	442.817	515.005		0.996508	2.00063	0.912027
142.133	143.506	75.638	79.2754		357.285	893.005	501.61	389.669		1.0409	1.57504	0.99808
121.118	169.39	116.048	171.912		347.24	920.994	700.491	446.131		0.979594	1.10781	0.92332
101.696	134.651	158.093	121.291		504.009	999.109	814.533	552.076		0.957193	1.07664	1.08017
107.085	133.992	135.423	189.083		287.733	897.782	613.779	793.394		0.905307	1.2635	1.00486
94.8838	178.113	144.582	124.969		283.463	1041.57	678.473	518.78		1.02059	0.886176	0.919593
151.638	101.333	129.469	161.467		493.443	777.471	740.259	571.288		0.908271	1.18393	1.07938
173.242	136.373	138.906	167.8		570.254	899.519	543.918	514.661		1.01948	0.907184	0.92369
114.44	116.099	119.448	148.947		361.887	932.209	566.643	781.682		0.876439	1.56272	0.906756
149.139	125.343	131.803	150.319		402.008	985.694	672.955	643.874		0.865436	0.898052	1.07808
131.95	76.5894	141.015	132.769		381.589	818.941	481.196	608.65		1.04919	1.06627	0.98185
142.625	99.8424	153.49	124.488		229.438	867.008	247.209	235.254		0.936101	1.03365	0.879617
100.502	153.868	152.382	137.73		315.491	1207.32	659.813	586.593		0.870615	1.01555	1.16184
111.22	132.205	117.377	148.199		460.682	1082.44	485.663	486.257		1.21372	0.959967	1.24194
117.983	117.358	72.242	126.962		460.506	942.31	314.775	500.538		0.937128	0.881822	0.903522
62.8022	146.006	86.831	116.37		291.194	781.808	752.177	511.124		0.905006	0.920148	1.28313
47.6712	143.75	31.097	113.18		436.01	601.412	385.545	488.299		1.07884	1.45888	1.14285
74.7882	269.737	82.412	128.902		264.91	817.373	572.781	526.549		0.993474	1.00694	0.885251
114.725	160.131	97.364	172.341		328.465	661.121	643.818	413.331		0.956845	0.90426	0.888553
110.025	194.355	104.195	118.36		359.894	953.219	523.535	470.906		1.1472	1.23531	0.889451
154.543	137.979	152.122	202.404		450.774	741.016	601.771	429.036		1.12642	1.08194	1.19746
85.6662	180.942	146.435	67.9174		425.693	768.543	522.764	260.764		0.963742	0.867245	1.044
90.1252	242.987	180.388	241.676		264.87	931.781	1278.7	330.067		1.18415	1.36255	0.875395
97.2522	119.043	144.906	152.811		315.851	682.786	625.046	407.884		1.00699	1.00925	1.1053
53.7952	148.611	97.685	107.246		310.391	807.669	571.365	391.14		0.878243	0.926557	0.907634
52.3162	173.874	95.858	130.93		409.996	660.921	652.318	422.892		1.4472	1.14703	1.43401
94.7132	156.431	114.928	183.811		186.278	1082.13	220.805	282.342		1.0834	1.39692	1.04767
116.776	154.528	132.632	173.14		415.913	561.923	729.896	366.937		0.90162	0.93014	0.843068
87.2642	162.996	55.801	120.412		329.652	582.085	455.872	383.776		1.34178	1.45329	0.969223
80.4352	163.092	74.68	140.838		301.069	740.532	424.536	551.864		1.03627	1.10857	0.781807
67.4138	133.412	64.953	54.6436		246.457	871.501	282.269	173.723		0.795063	0.971587	0.799048
126.466	122.898	121.048	83.4566		220.23	593.026	478.662	240.241		1.12861	1.62633	0.827462
80.2138	164.183	89.551	56.0406		265.806	727.412	497.601	229.785		0.988634	1.23028	0.73435
133.007	170.506	79.455	115.894		232.341	805.782	597.261	209.001		0.880972	0.975828	0.765142
82.6388	131.117	147.075	99.2406		259.089	671.137	650.053	248.05		1.1829	1.64135	1.04553
127.912	125.588	68.865	65.7996		339.282	733.093	516.1	250.077		0.970019	1.01105	0.833056
87.7358	137.264	84.402	82.9576		321.582	656.292	589.405	198.746		0.887232	0.973203	0.931303
83.1168	171.534	91.864	144.976		338.273	721.775	993.658	256.926		0.805785	1.28426	0.811318
129.941	203.506	90.491	98.9336		335.068	890.041	459.253	163.597		0.726645	1.06682	0.738315
109.942	142.771	78.248	64.8696		288.387	753.375	653.789	189.675		0.738013	0.881939	0.742386
99.0768	173.086	69.525	70.9386		338.907	779.79	613.933	251.675		0.779104	1.19696
84.5448	180.162	111.64	69.2936		167.238	251.349	208.14	140.068		0.739983	1.05776
129.864	109.817	90.871	103.159		340.892	734.968	608.31	257.857		0.751566	0.971711
86.0338	142.47	109.358	117.029		309.53	726.769	605.887	225.13			1.40312
125.343	218.565	95.924	72.2266		304.753	897.631	675.573	195.074			1.10064
107.504	113.875		59.9554		366.1	736.464	153.885	254.527			0.909537
155.88	130.823	15.531	79.6294		466.519	898.225	398.887	226.111			1.3915
201.686	152.457		148.342		394.779	742.681	353.351	312.652			1.03625
70.6728	119.579		94.1154		414.755	698.814	196.288	377.309			0.858952
114.198	147.063	11.564	64.9484		417.019	817.253	462.686	229.486			1.0534
131.331	75.4177	28.742	119.419		367.009	474.837	584.257	256.07			0.850983
106.447	94.3577		64.5714		321.841	560.487	211.454	288.232			0.830426
108.257	125.362		95.2374		445.978	756.356	235.948	257.968			1.28869
132.131	124.699		85.7674		332.458	735.343	193.584	319.305			0.826476
140.263	175.211	12.779	61.6544		378.748	522.307	353.823	214.075			0.783099
109.126	111.467	1.808	84.6204		363.754	557.728	243.822	189.135
107.558	123.537		117.138		204.177	214.722		192.616
145.732	138.521	46.091	83.8374		417.805	832.038	157.641	335.329
192.751	73.1997		85.2224		351.547	469.238	268.984	246.432
104.28	133.117		74.0384		385.031	973.347		197.151
