# Supplementary material for: Neuronal hyperexcitability is a DLK-dependent trigger of herpes simplex virus reactivation that can be induced by IL-1
Source: eLife. 2020 Dec 22;9:e58037. doi: 10.7554/eLife.58037 (PMC7773336; doi:10.7554/eLife.58037)
Supplement: Figure 7—source data 1. [file elife-58037-fig7-data1.xlsx]

## Sheet: Figure 7
7A			7B				7C					7D
Mock	IL-1		Forksolin	IL-1			IL-1	TTX	ZD	GNE		shCTRL	shDLK-1	shDLK-2
1	4		0	1	3		89	40	0	7		0	0	0
1	28		2	2	3		31	20	1	4		2	0	0
8	126			0	2		28	33	100	1		0	5	0
1	36		12	0	2		126	0	0	0		5	0	0
0	194		16	1			36	1	61	0
3	43		0	0	4		26	1	175	0		6	1	0
8	0		1	1	4		214		7	0		0	0	1
0	26		1	0	1		222		69	0		5	0	0
1	214		3	0	5		189		3	0
1	222				0		4			0
0	189											3	0	1
1	5		0	0	12							2	0	0
1	4		3	1	2							0	0	1
8	1		5	1	11							4	0	0
1	3		3	0
0	10		1	2								6	0	0
0	26		3	1								15	0	0
1	0		1	0								1	0	0
0	17		3									0	1	1
0	2
1	1
